# Supplementary material for: Synthesis, structure, magnetic and magnetocaloric properties of a series of {CrIII4LnIII} complexes
Source: Royal Society of Chemistry journal article supplement (doi:10.1039/c6nj00136j), 2016-01-01
Supplement: c6nj00136j1.pdf [file c6nj00136j1.pdf]

## Supporting Information

### Synthesis, structure, magnetic and magnetocaloric properties of a series of $\{\text{Cr}_4^{\text{III}}\text{Ln}^{\text{III}}\}$ complexes

Olivier Blacque,<sup>a</sup> Asma Amjad,<sup>b</sup> Andrea Caneschi,<sup>b</sup> Lorenzo Sorace,<sup>\*b</sup> Pierre-Emmanuel Car,<sup>\*a</sup>

<sup>a</sup> Department of Chemistry, University of Zurich, Winterthurerstrasse 190, CH-8057 Zurich, Switzerland.  
*E-mail:* [pierre-emmanuel.car@chem.uzh.ch](mailto:pierre-emmanuel.car@chem.uzh.ch)

<sup>b</sup> Dipartimento di Chimica Ugo Schiff & UdR INSTM, Università degli Studi di Firenze, Vial della Lastruccia 3-13, 50019 Sesto Fiorentino, Italy. *E-mail:* [lorenzo.sorace@unifi.it](mailto:lorenzo.sorace@unifi.it)

#### Table of Contents

|                                                         |   |
|---------------------------------------------------------|---|
| 1. Selected bond lengths and angles                     | 2 |
| 2. Crystal packing and crystal structure representation | 6 |
| 3. Coordination geometry of Dy(III) ion                 | 9 |

## 1. Selected bond lengths and angles

Table S1. Selected bond lengths (Å) and angles (°) for **1a**.

| Bonds                     | Length ranges (Å)   | Bonds               | Length ranges (Å) |
|---------------------------|---------------------|---------------------|-------------------|
| d(Cr···O)                 | 1.923(2)-1.982(2)   | d(Cr···N)           | 2.041(3)-2.079(3) |
| d(Dy···O)                 | 2.348(2)-2.431(2)   |                     |                   |
| Interatomic distances (Å) |                     | Selected angles (°) |                   |
| Cr···Cr                   | 5.2198(7)-7.8419(8) | Dy1–O7–Cr2          | 133.57(10)        |
| Cr···Dy                   | 3.4399(5)-3.9809(7) | Dy1–O17–Cr4         | 132.35(11)        |
| Selected angles (°)       |                     | Dy1–O3–Cr1          | 105.681(8)        |
| Cr2···Dy1···Cr4           | 162.923(14)         | Dy1–O18–Cr1         | 102.86(8)         |
| Cr1···Dy1···Cr3           | 110.041(16)         | Dy1–O8–Cr3          | 103.62(9)         |
|                           |                     | Dy1–O13–Cr3         | 105.40(9)         |

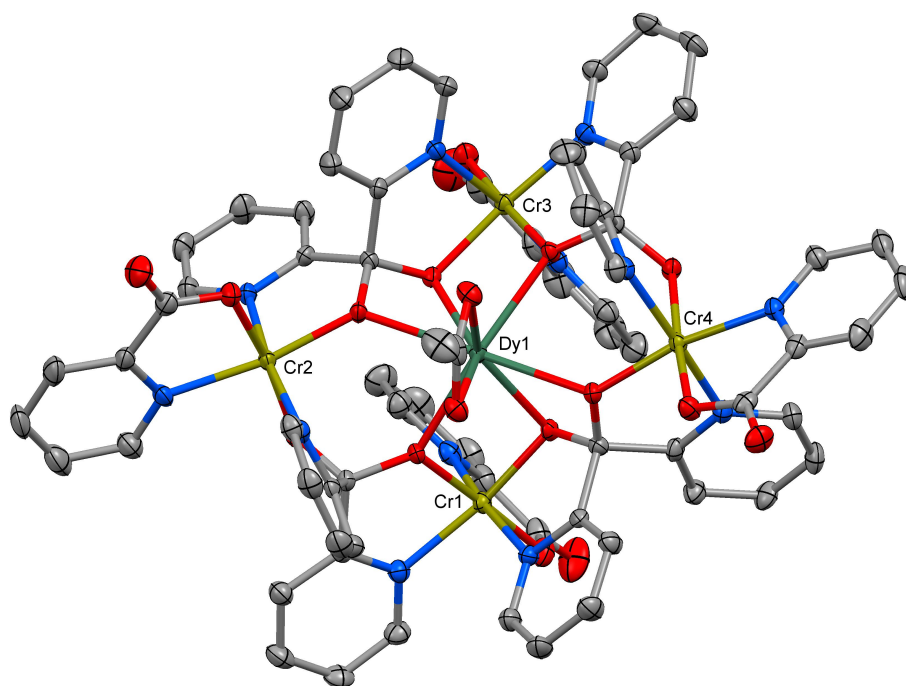

Figure S1. Ellipsoidal representation of **1a**, with a probability of the ellipsoids of 50%.

**Table S2.** Selected bond lengths (Å) and angles (°) for **1b**.

| Bonds                     | Length ranges (Å)   | Bonds               | Length ranges (Å) |
|---------------------------|---------------------|---------------------|-------------------|
| d(Cr···O)                 | 1.911(2)-1.980(3)   | d(Cr···N)           | 2.038(3)-2.080(3) |
| d(Dy···O)                 | 2.348(2)-2.431(2)   |                     |                   |
| Interatomic distances (Å) |                     | Selected angles (°) |                   |
| Cr···Cr                   | 5.1764(7)-7.8872(9) | Dy1–O7–Cr2          | 132.2(1)          |
| Cr···Dy                   | 3.4479(6)-3.9837(8) | Dy1–O17–Cr4         | 132.5(1)          |
| Selected angles (°)       |                     | Dy1–O3–Cr1          | 106.6(1)          |
| Cr2···Dy1···Cr4           | 165.96(2)           | Dy1–O18–Cr1         | 104.2(1)          |
| Cr1···Dy1···Cr3           | 117.20(2)           | Dy1–O8–Cr3          | 104.5(1)          |
|                           |                     | Dy1–O13–Cr3         | 105.4(1)          |

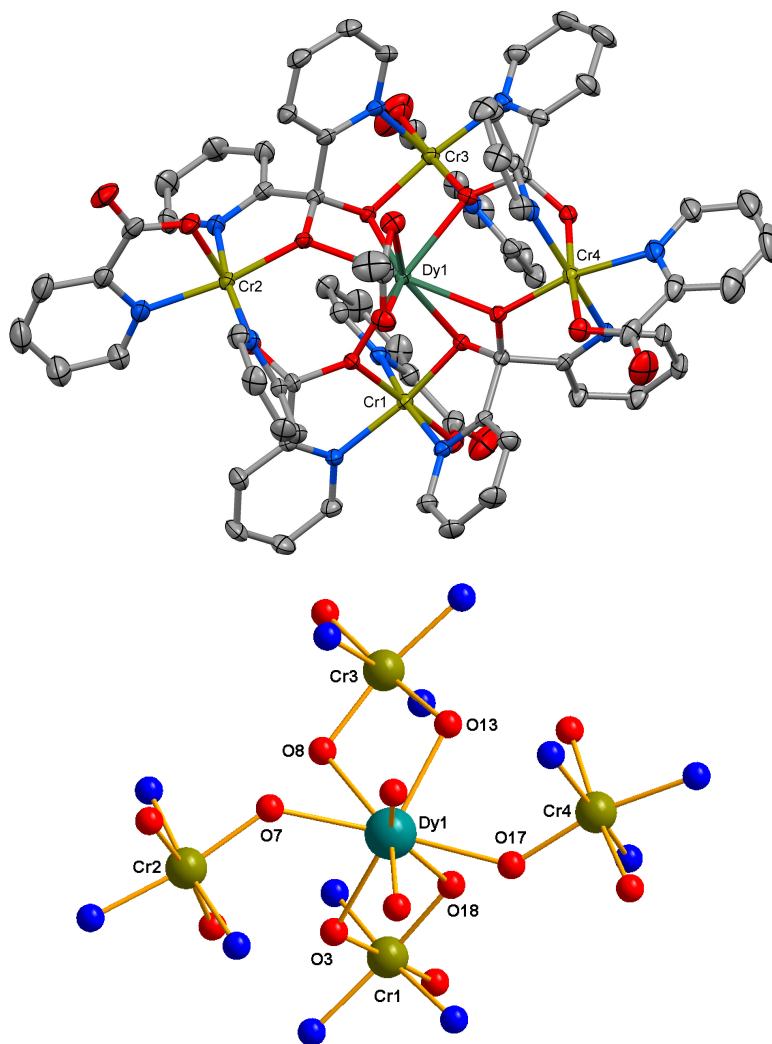

**Figure S2.** Top: Ellipsoidal representation of **1b**, with a probability of the ellipsoids of 50%. Bottom: Ball and stick representation with labelled atoms of the central metal core of complexes **1a** and **1b**.

**Table S3.** Selected bond lengths (Å) and angles (°) for **2**.

| Bonds                     | Length ranges (Å)     | Bonds               | Length ranges (Å) |
|---------------------------|-----------------------|---------------------|-------------------|
| d(Cr···O)                 | 1.916(5)-1.981(5)     | d(Cr···N)           | 2.032(7)-2.086(7) |
| d(Tb···O)                 | 2.358(5)- 2.426(4)    |                     |                   |
| Interatomic distances (Å) |                       | Selected angles (°) |                   |
| Cr···Cr                   | 5.1824(16)-7.8924(17) | Tb1–O7–Cr2          | 131.88(22)        |
| Cr···Tb                   | 3.4553(13)-3.8949(12) | Tb1–O17–Cr4         | 131.61(22)        |
| Selected angles (°)       |                       | Tb1–O3–Cr1          | 106.98(20)        |
| Cr2···Tb1···Cr4           | 166.187(27)           | Tb1–O18–Cr1         | 104.02(19)        |
| Cr1···Tb1···Cr3           | 106.992(29)           | Tb1–O8–Cr3          | 104.11(19)        |
|                           |                       | Tb1–O13–Cr3         | 105.39(20)        |

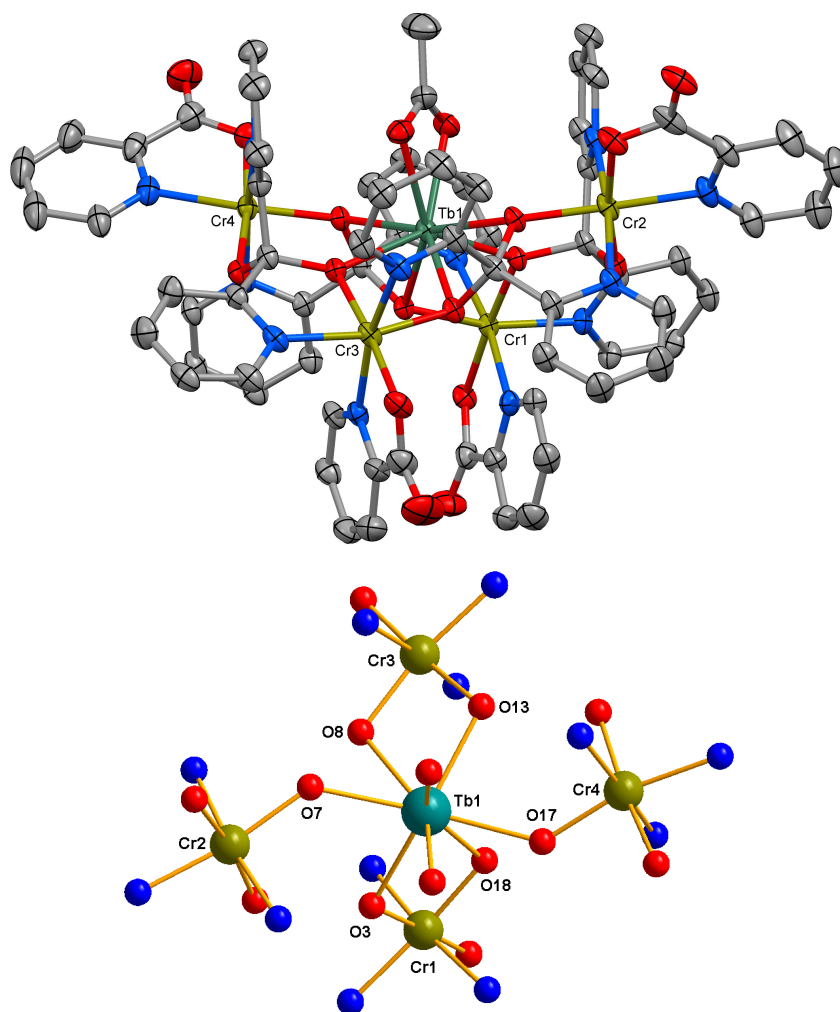

**Figure S3.** Top: Ellipsoidal representation of **2**, with a probability of the ellipsoids of 30%. Bottom: Ball and stick representation with labelled atoms of the central metal core of complexes **2**.

**Table S4.** Selected bond lengths (Å) and angles (°) for **3**.

| Bonds                     | Length ranges (Å)     | Bonds               | Length ranges (Å) |
|---------------------------|-----------------------|---------------------|-------------------|
| d(Cr···O)                 | 1.911(3)-1.979(3)     | d(Cr···N)           | 2.044(3)-2.081(4) |
| d(Gd···O)                 | 2.384(3)-2.449(3)     |                     |                   |
|                           |                       |                     |                   |
| Interatomic distances (Å) |                       | Selected angles (°) |                   |
| Cr···Cr                   | 5.1863(9)-7.9177(10)  | Gd1–O4–Cr1          | 131.63(13)        |
| Cr···Gd                   | 3.4553(13)-3.8949(12) | Gd1–O13–Cr4         | 131.49(13)        |
| Selected angles (°)       |                       | Gd1–O11–Cr3         | 105.68(12)        |
| Cr1···Gd1···Cr4           | 167.254(19)           | Gd1–O12–Cr3         | 103.98(11)        |
| Cr2···Gd1···Cr3           | 106.971(19)           | Gd1–O5–Cr2          | 103.86(11)        |
|                           |                       | Gd1–O8–Cr2          | 106.87(12)        |

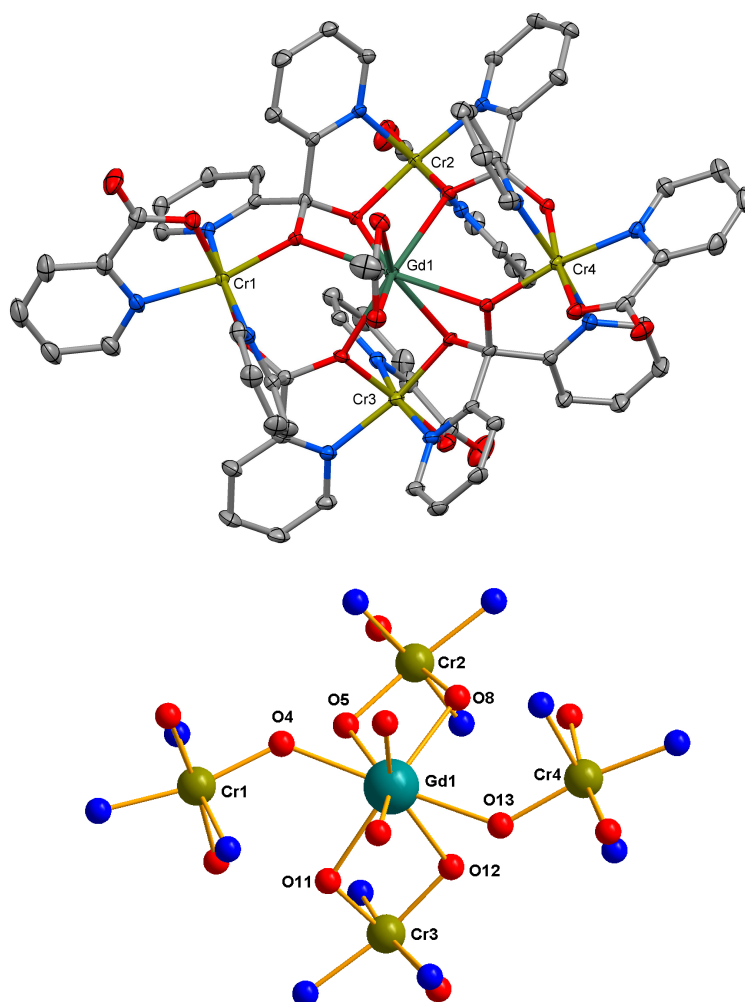

**Figure S4.** Top: Ellipsoidal representation of **3**, with a probability of the ellipsoids of 30%. Bottom: Ball and stick representation with labelled atoms of the central metal core of complexes **3**.

## 2. Crystal packing and crystal structure representation

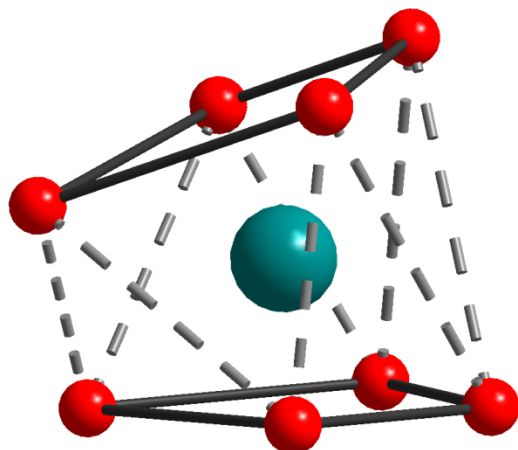

**Figure S5.** Representation of the highly distorted square anti-prism geometry around Dy1. Colour code: Dy: teal, O: Red.

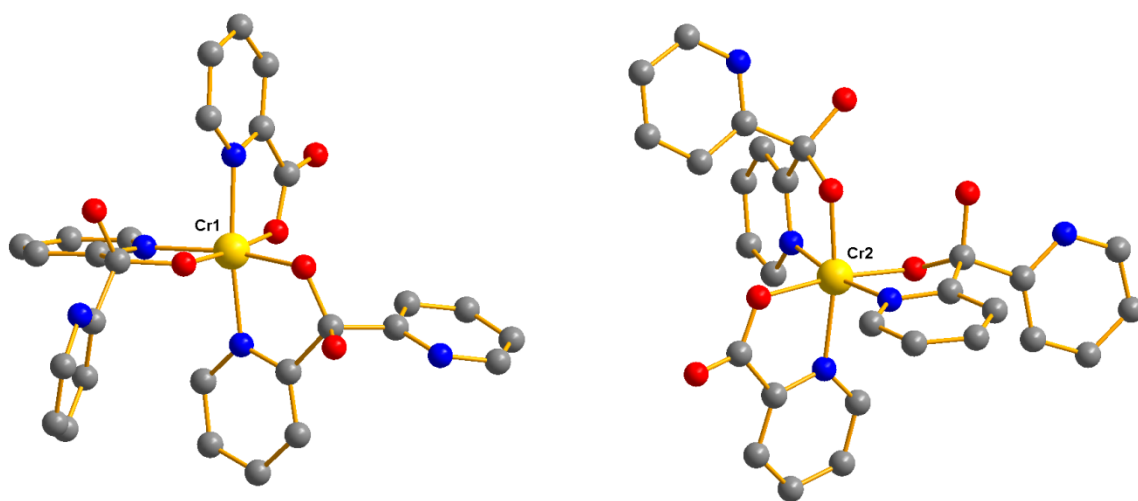

**Figure S6.** Ball and stick representations of the octahedral Cr1 (left) and Cr2 (right) closed environment, in complexes **1a**, **1b**, and **2**. Colour code: Cr: yellow, O: red, N: blue, C: grey.

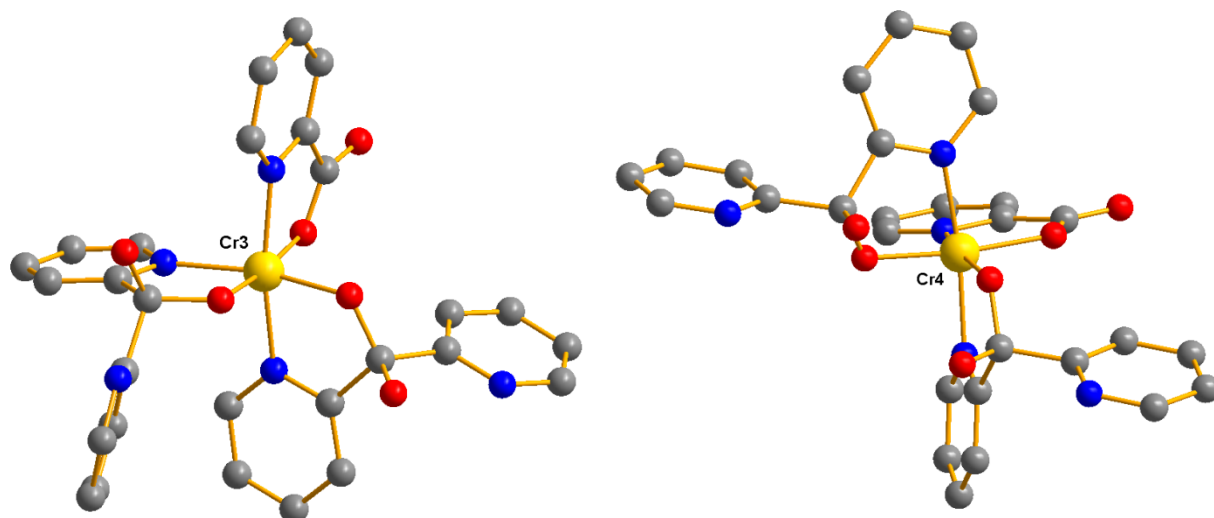

**Figure S7.** Ball and stick representations of the octahedral Cr2 (left) and Cr3 (right) closed environment, in complexes **1a**, **1b**, and **2**. Colour code: Cr: yellow, O: red, N: blue, C: grey.

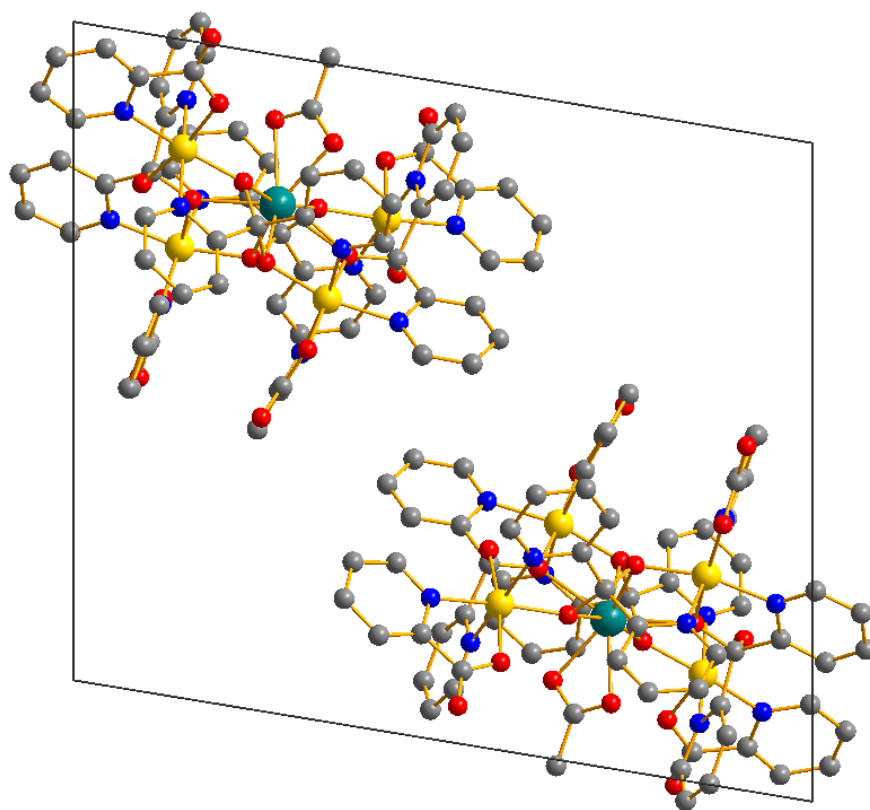

**Figure S8.** Ball and stick representation of the unit cell of complex **1a** (along a axis). Nitrate anions and water molecules are omitted for clarity, as well as the H atoms. C atoms are represented as sticks for clarity. Cr<sup>III</sup>: yellow, Dy<sup>III</sup>: teal, O: red, N: blue, C: grey.

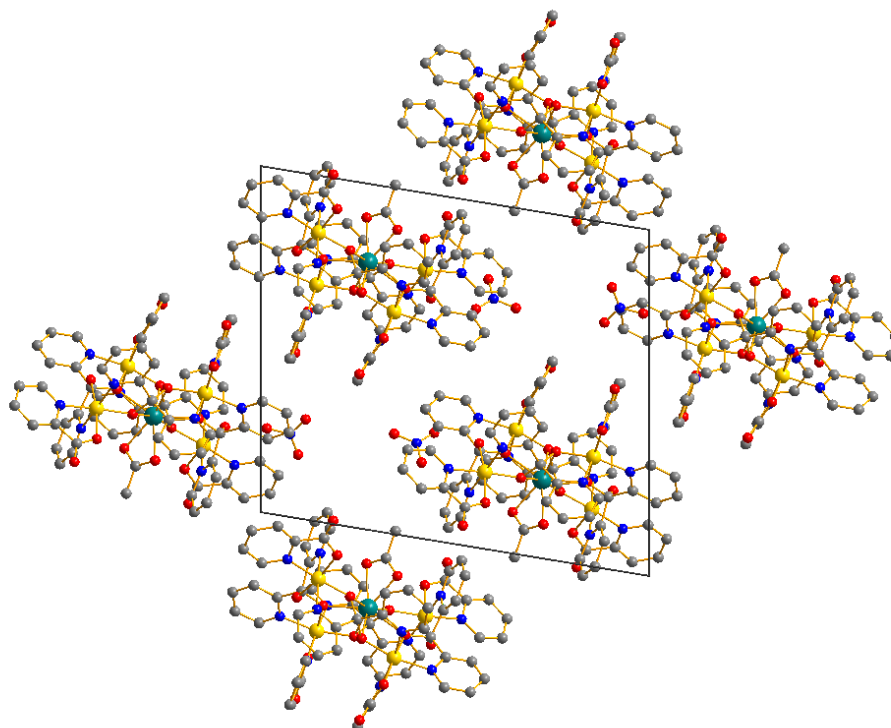

**Figure S9.** Ball and stick representation of an extended unit cell of complex **1a** (along a axis). Nitrate anions and water molecules are omitted for clarity, as well as the H atoms. C atoms are represented as sticks for clarity. Cr<sup>III</sup>: yellow, Dy<sup>III</sup>: teal, O: red, N: blue, C: grey.

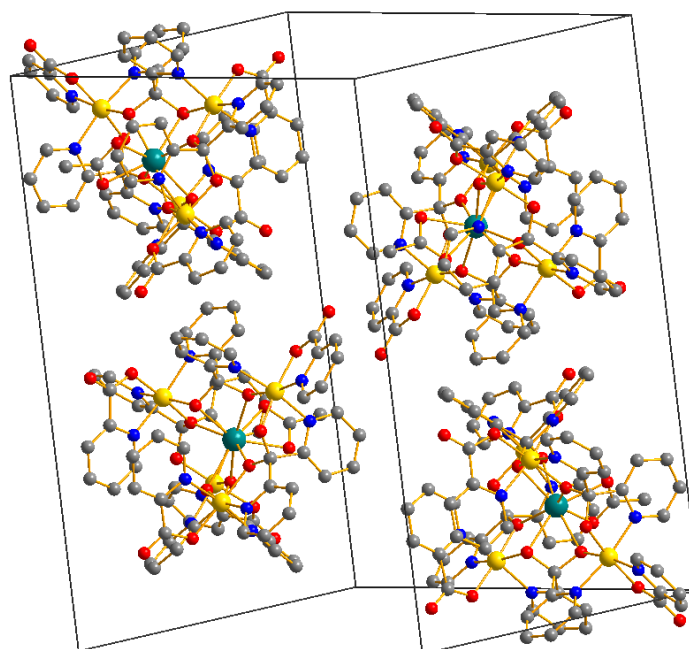

**Figure S10.** Ball and stick representation of the unit cell of complex **1b**. Nitrate anions and water molecules are omitted for clarity, as well as the H atoms. C atoms are represented as sticks for clarity. Cr<sup>III</sup>: yellow, Dy<sup>III</sup>: teal, O: red, N: blue, C: grey.



### 3. Coordination geometry of Dy(III) ion

Results of Continuous Shape measurements for LnCr<sub>4</sub> complexes. Legend and corresponding symmetry: HPY: C<sub>7v</sub> Heptagonal pyramid; HBPY: D<sub>6h</sub> Hexagonal bipyramid; CU: Oh, Cube; SAPR: D<sub>4d</sub> Square antiprism; TDD: D<sub>2d</sub>, Triangular dodecahedron; JGBF: D<sub>2d</sub>, Johnson gyrobifastigium; JETBPY: D<sub>3h</sub>, Johnson elongated triangular bipyramid; JBTPR: C<sub>2v</sub>, Biaugmented trigonal prism J50; BTPR: C<sub>2v</sub>, Biaugmented trigonal prism; JSD: D<sub>2d</sub>, Snub diphenoid; TT: Td, Triakis tetrahedron; ETBPY: D<sub>3h</sub>, Elongated trigonal bipyramid

**Table S5 (two parts).** Results of Continuous Shape measurements for Dy(III) ions in complex **1a**.

|        |        |       |       |       |        |
|--------|--------|-------|-------|-------|--------|
| HPY    | HBPY   | CU    | SAPR  | TDD   | JGBF   |
| 19.595 | 12.811 | 6.340 | 4.092 | 3.921 | 15.579 |

|        |       |       |       |       |        |
|--------|-------|-------|-------|-------|--------|
| JETBPY | JBTPR | BTPR  | JSD   | TT    | ETBPY  |
| 23.226 | 6.321 | 5.726 | 8.109 | 7.189 | 20.569 |
